# Supplementary material for: Synthesis, DNA/protein binding, molecular docking, DNA cleavage and in vitro anticancer activity of nickel(ii) bis(thiosemicarbazone) complexes
Source: Royal Society of Chemistry journal article supplement (doi:10.1039/c5ra04498g), 2015-01-01
Supplement: c5ra04498g1.pdf [file c5ra04498g1.pdf]

**Synthesis, DNA/protein binding, molecular docking, DNA cleavage and *in vitro* anticancer activity of nickel(II) bis(thiosemicarbazone) complexes**

Jebiti Haribabu, Kumaramangalam Jeyalakshmi, Yuvaraj Arun, Nattamai S. P. Bhuvanesh,  
Paramasivan Thirumalai Perumal, and Ramasamy Karvembu

**Supplementary Information**

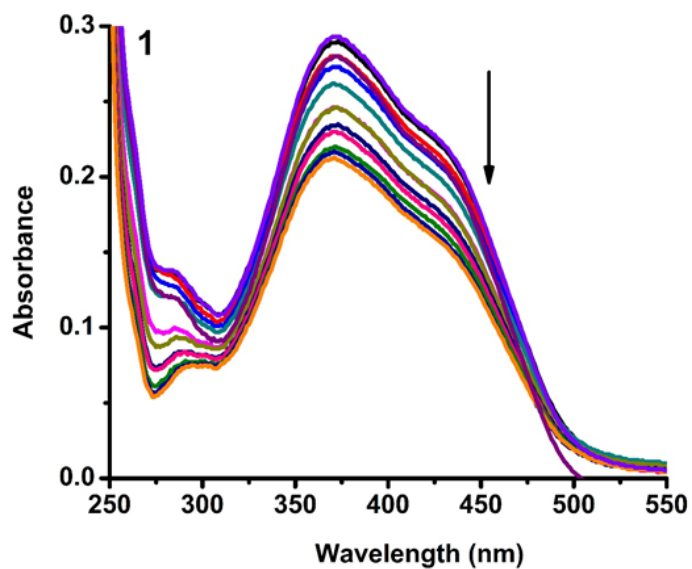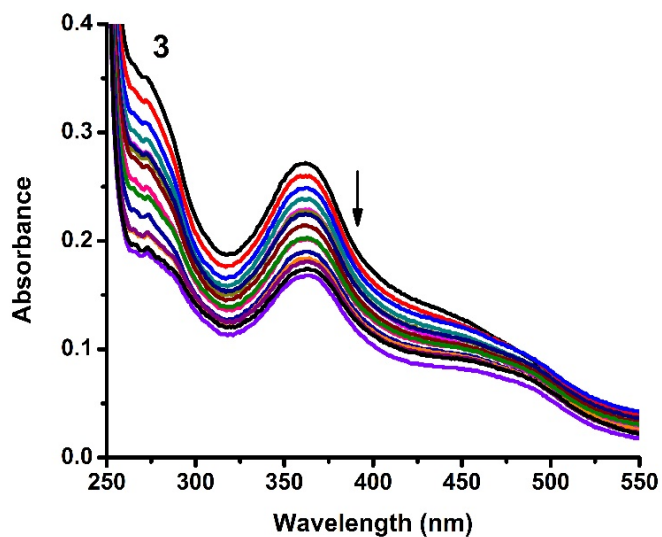

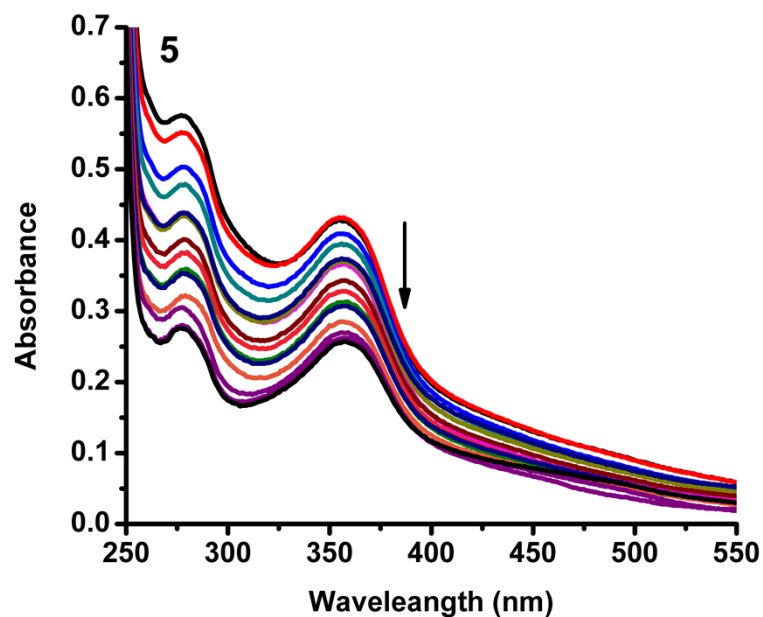

**Fig. S1** Absorption spectra of complexes **1**, **3** and **5** in Tris-HCl buffer upon addition of CT DNA. [Complex] =  $1.5 \times 10^{-5}$  M, [DNA] = 0-50  $\mu$ M. Arrow shows that the absorption intensities decrease upon increasing DNA concentration.

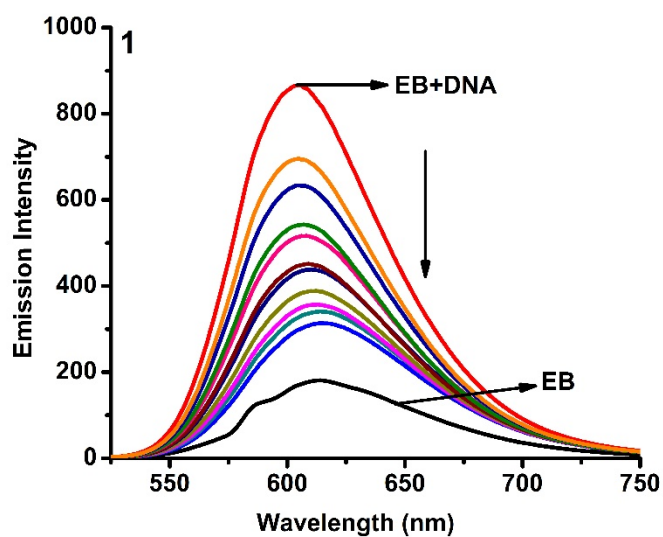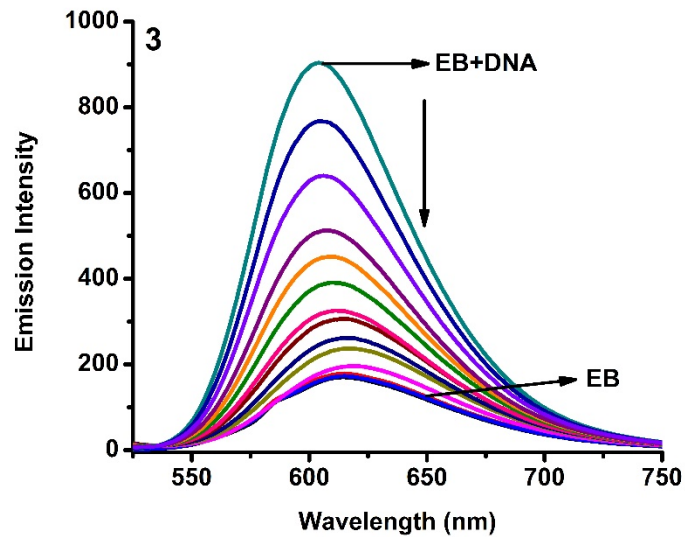

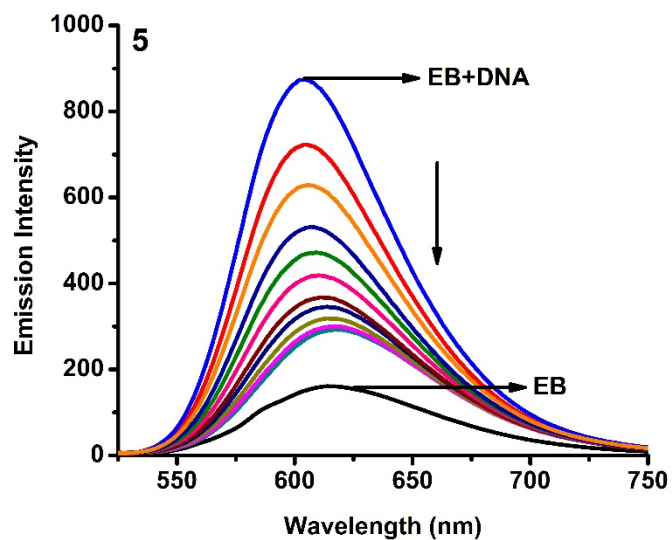

**Fig. S2** Fluorescence quenching curves of EB bound to DNA in the presence of **1**, **3** and **5**. [DNA] = 5  $\mu$ M, [EB] = 5  $\mu$ M and [complex] = 0-50  $\mu$ M.

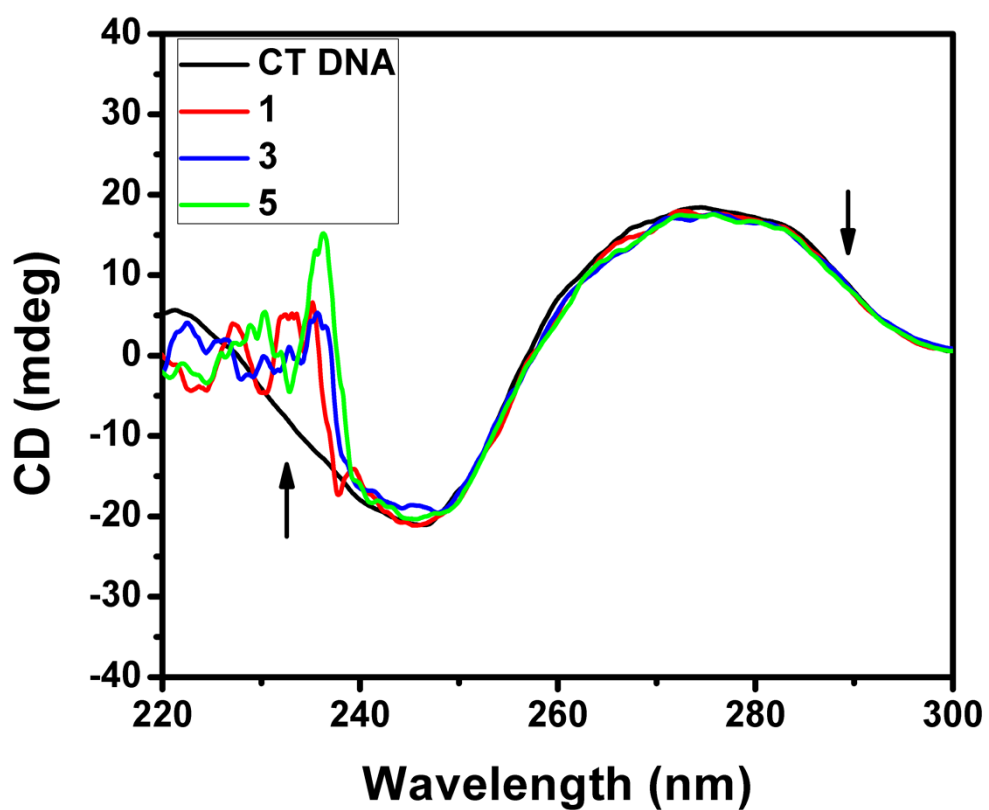

**Fig. 3** CD spectra of CT DNA (200  $\mu$ M) in the absence and presence of 40  $\mu$ M of complexes **1**, **3** and **5**.

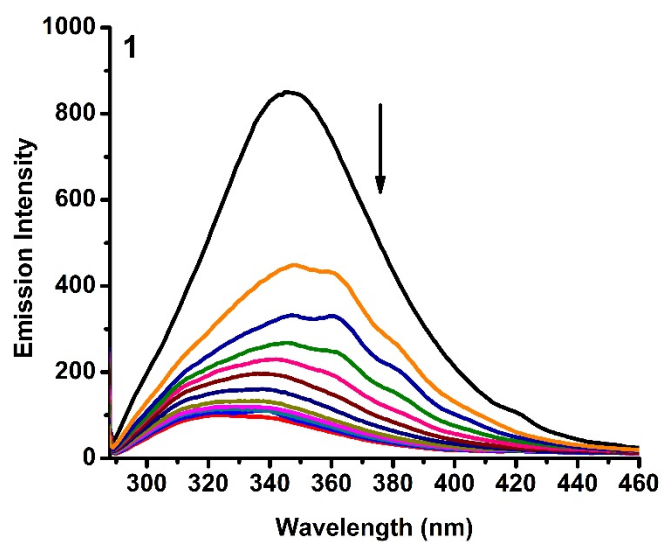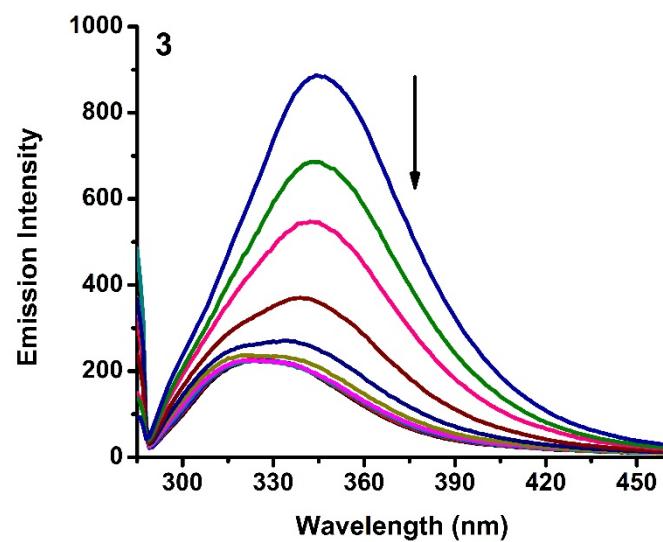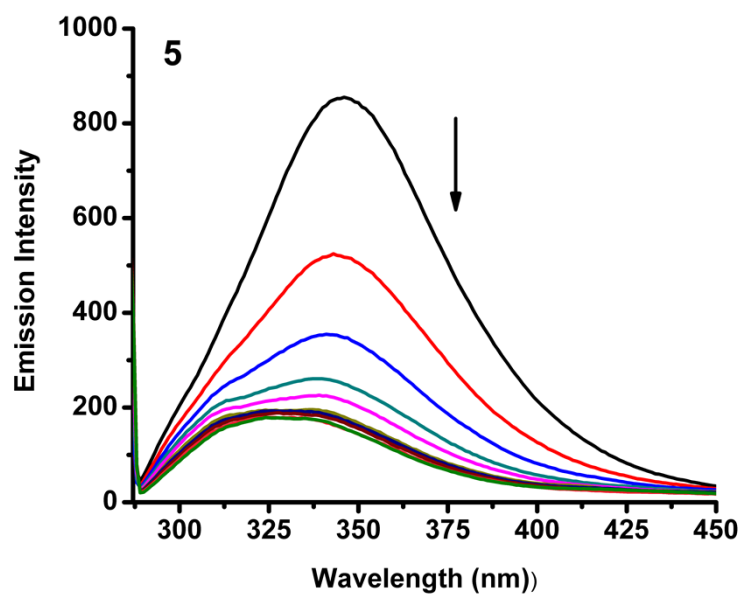

**Fig. S4** Fluorescence quenching curves of BSA in the absence and presence of **1**, **3** and **5**. [BSA] = 1  $\mu$ M and [complex] = 0-50  $\mu$ M.

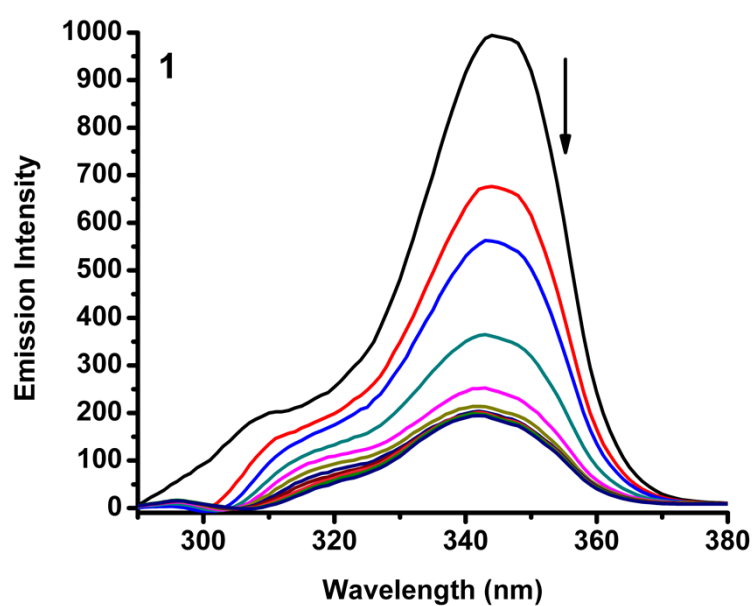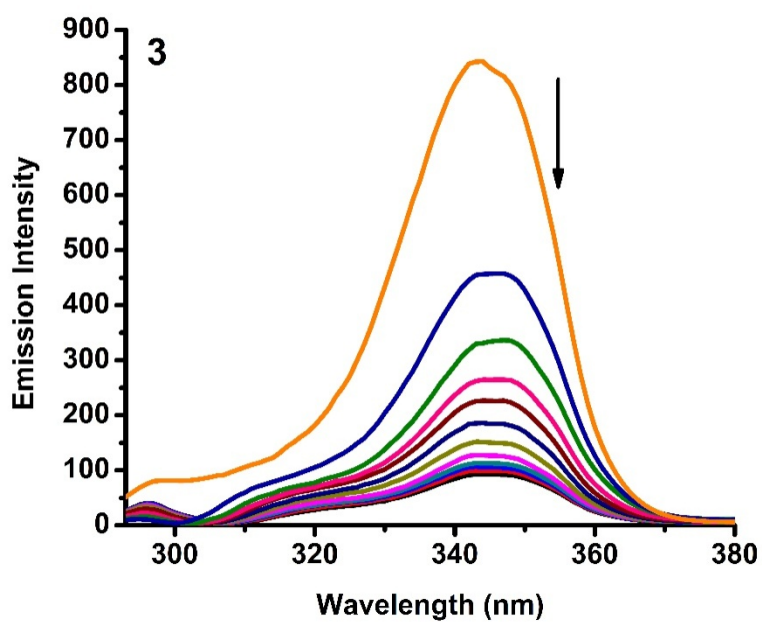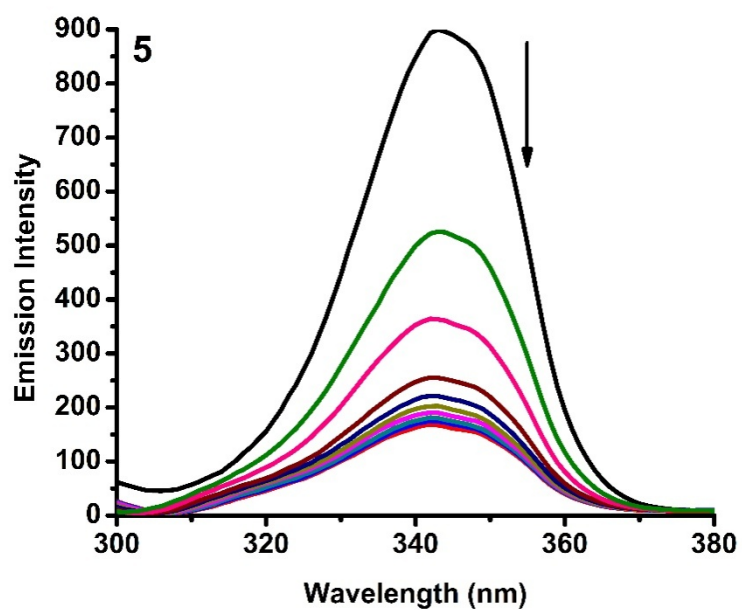

**Fig. S5** Synchronous spectra of BSA (1  $\mu\text{M}$ ) as a function of concentration of **1**, **3** and **5** (0-50  $\mu\text{M}$ ) with  $\Delta\lambda = 60$  nm.

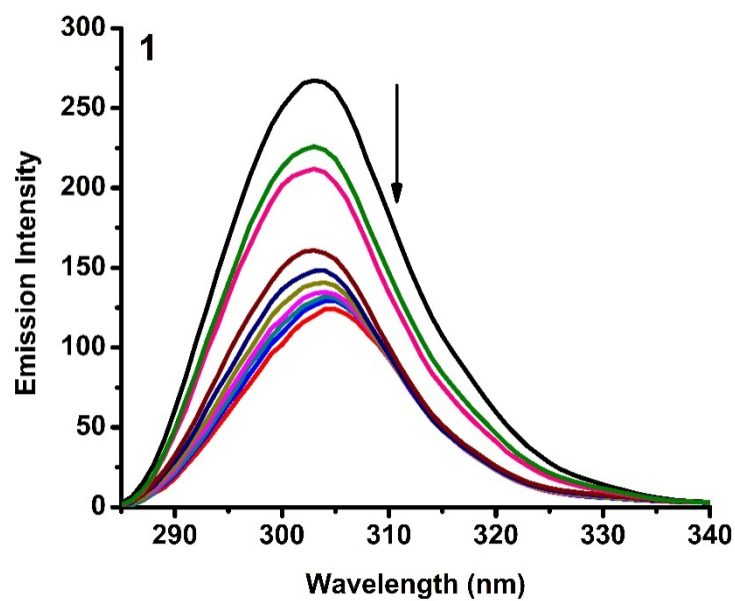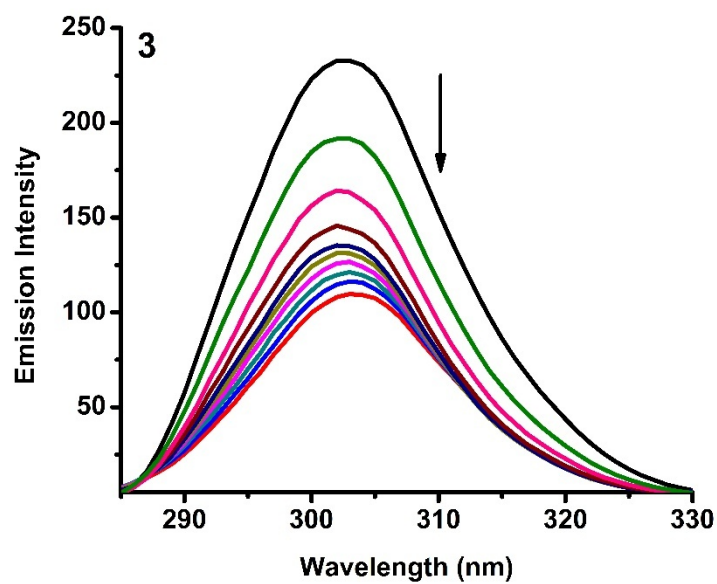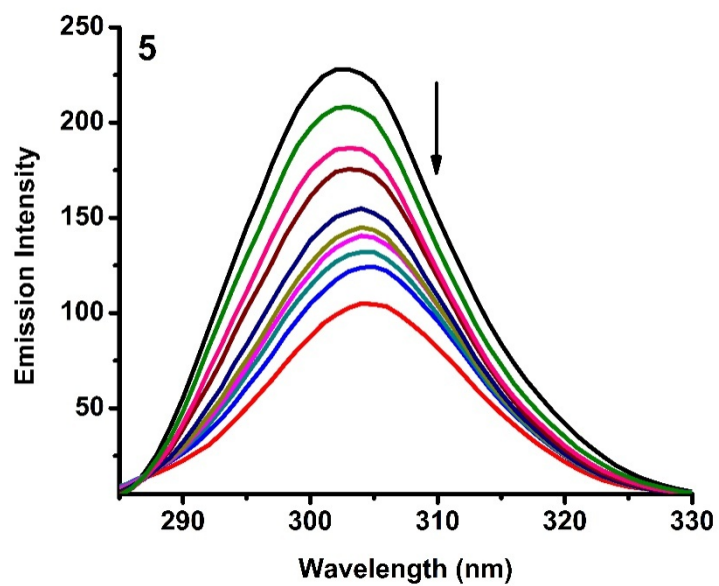

**Fig. S6** Synchronous spectra of BSA (1  $\mu\text{M}$ ) as a function of concentration of **1**, **3** and **5** (0-50  $\mu\text{M}$ ) with  $\Delta\lambda = 15$  nm.

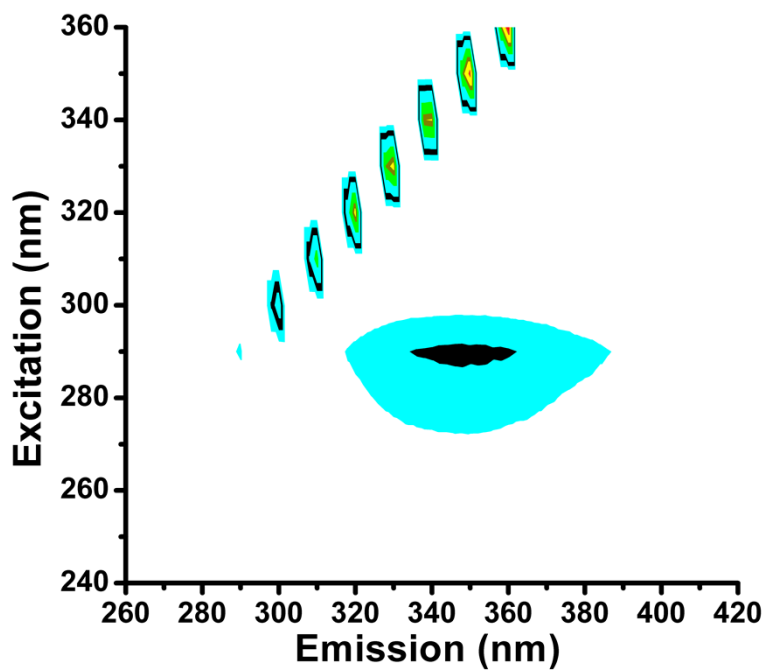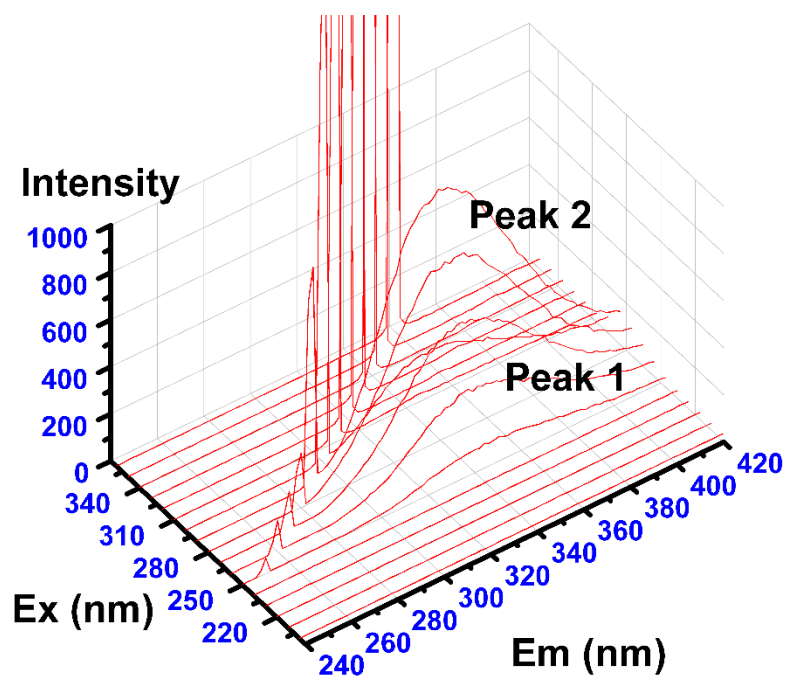

D)

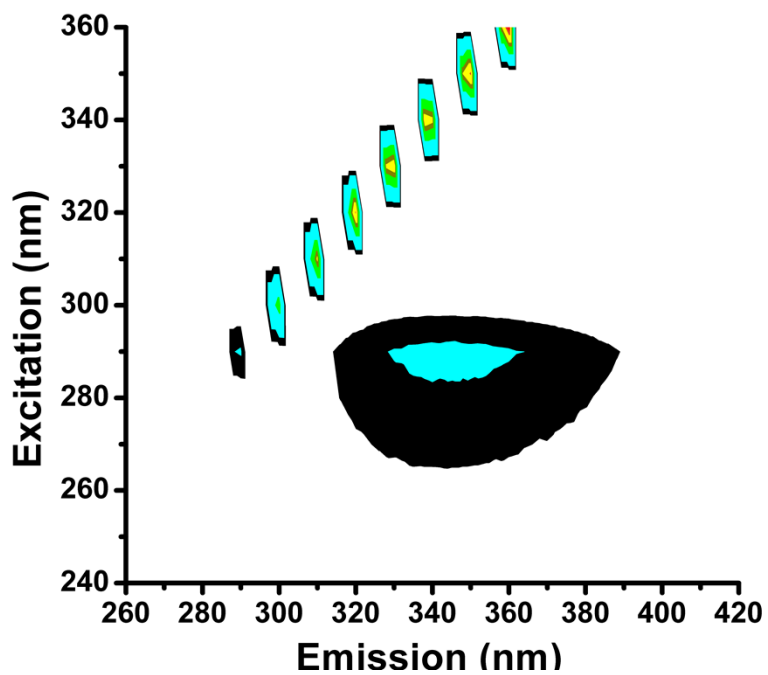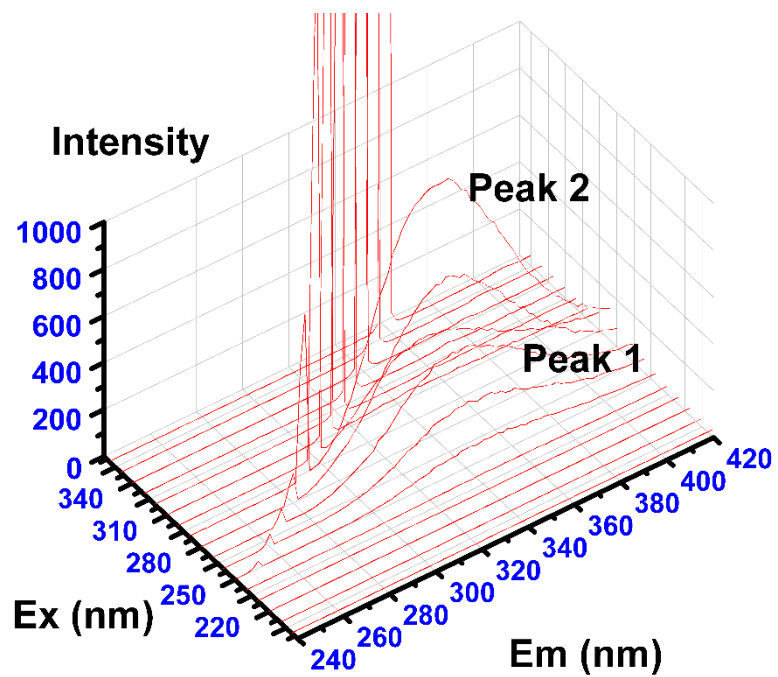

E)



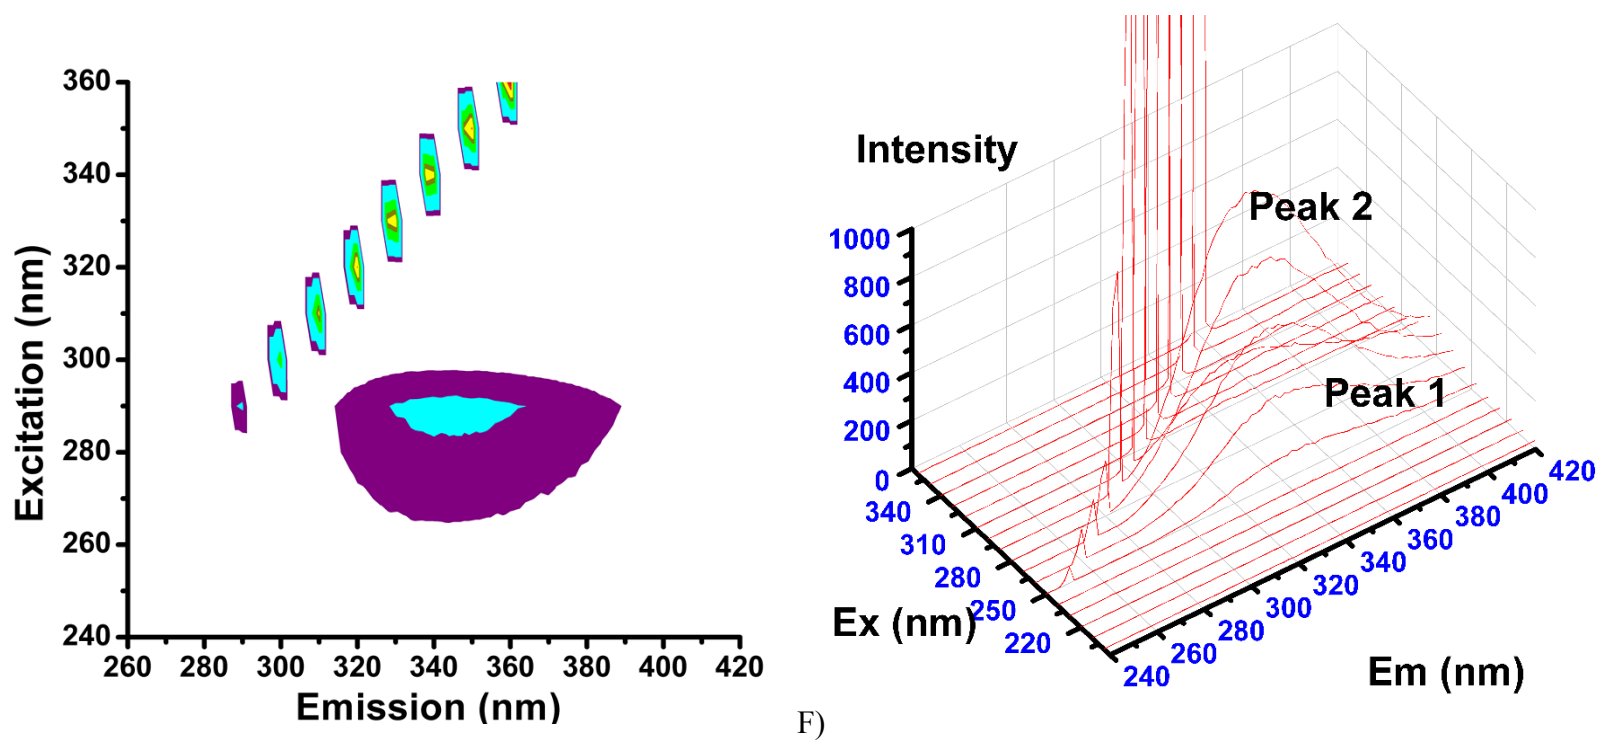

F)

Fig. S7 Three dimensional fluorescence spectra of D) BSA-1, E) BSA-3 and F) BSA-5

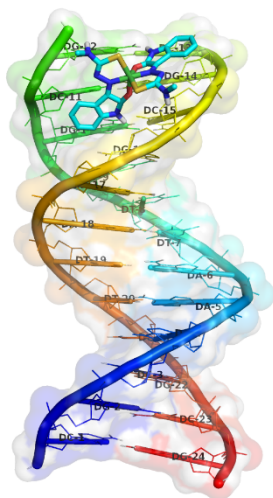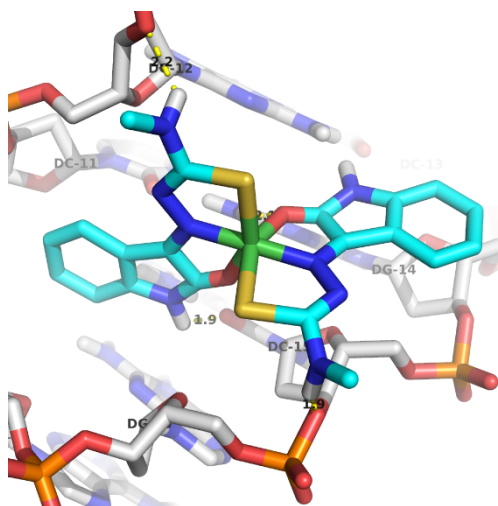



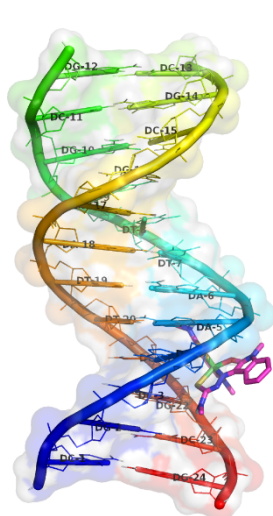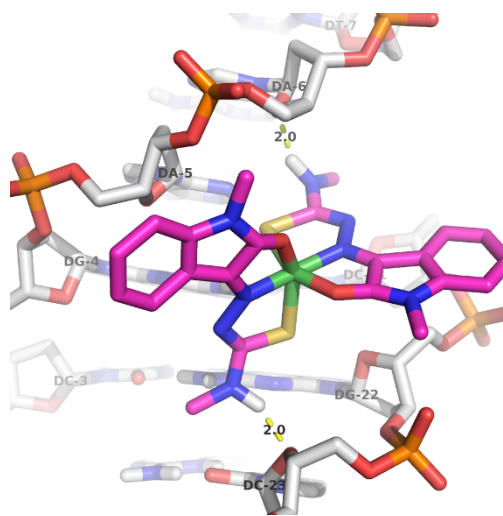

3

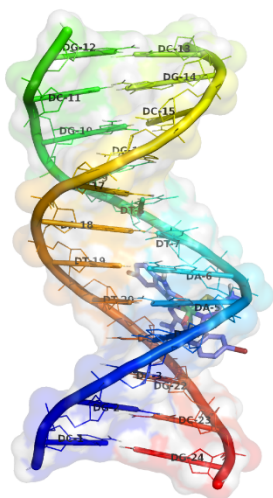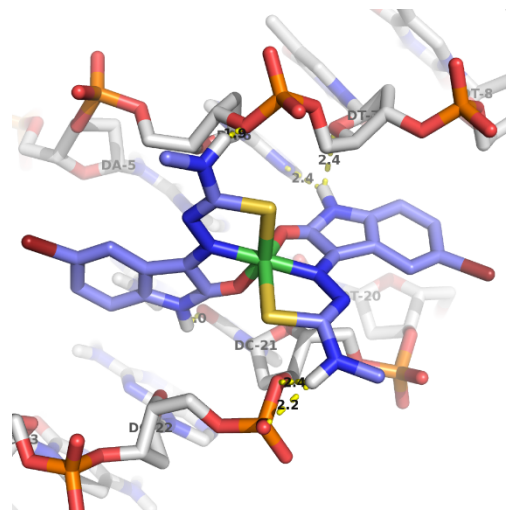

5

**Fig. S8** Docking pose of nickel complexes **1**, **3** and **5** with B-DNA (1BNA).

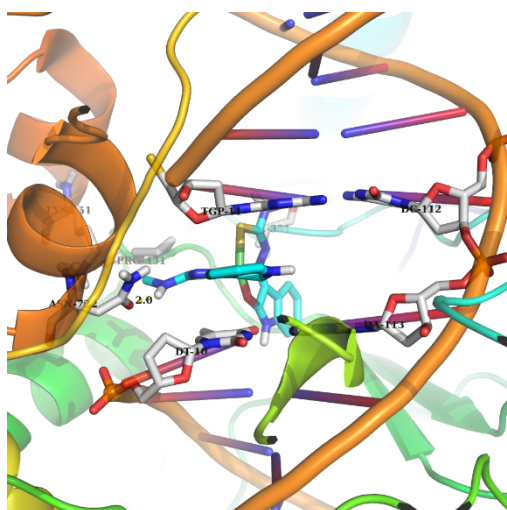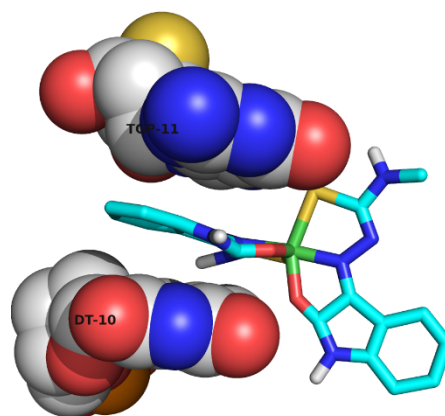

1

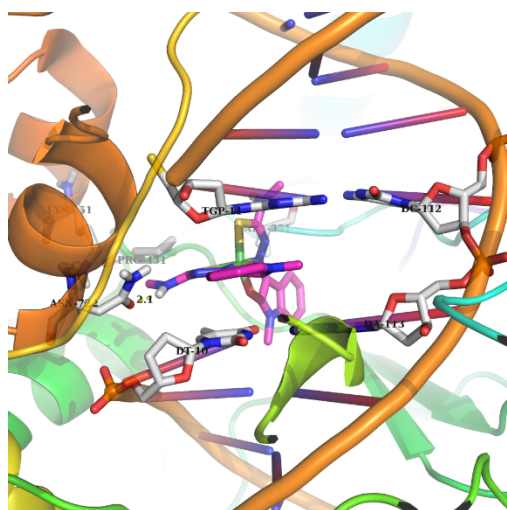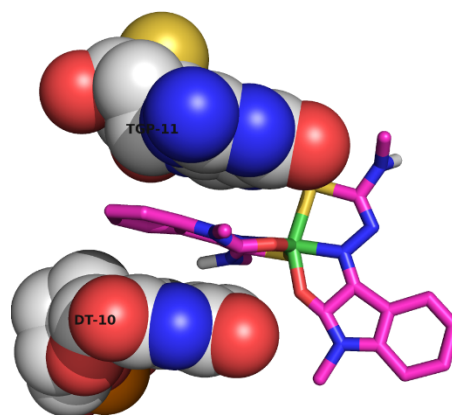

3

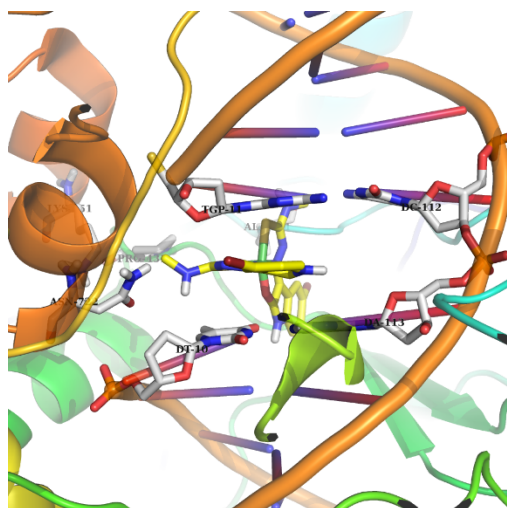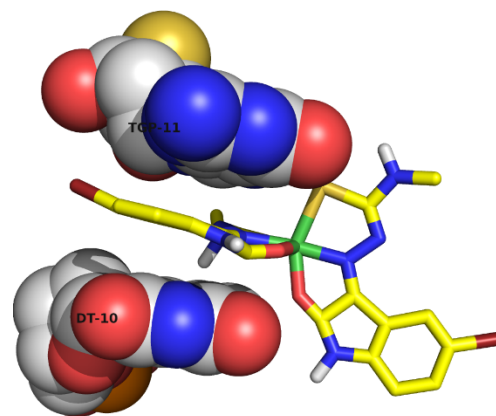

5

**Fig. S9** Docking pose of nickel complexes **1**, **3** and **5** with DNA-Topoisomerase I (1SC7).

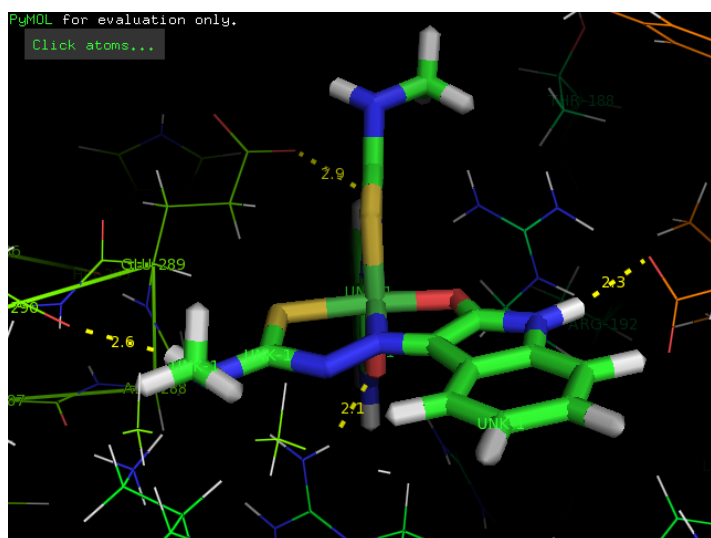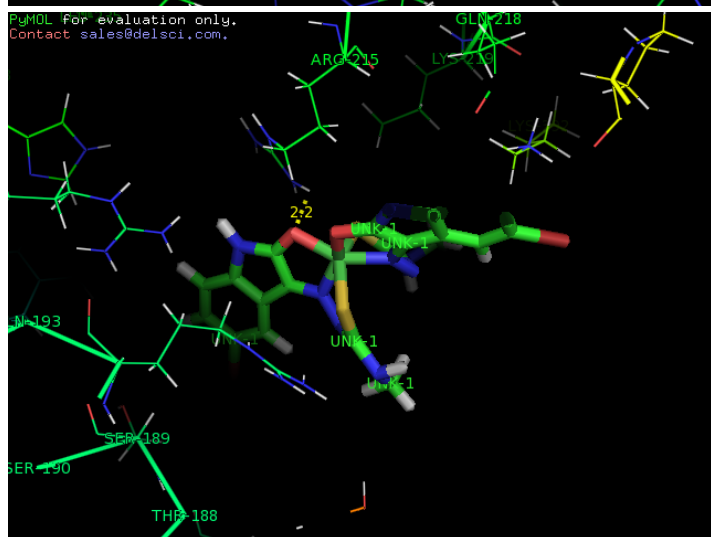

**5**

**Fig. S10** Docking pose of nickel complexes **1**, **3** and **5** with protein (3V03).
